# Supplementary material for: Do corticosteroids reduce the mortality of influenza A (H1N1) infection? A meta-analysis
Source: Springer Nature journal article supplement (doi:10.1186/s13054-015-0764-5), 2015-02-03
Supplement: MOESM2 [file 9780140]

## Additional file 2: Forest plots of subgroup analyses for case control studies

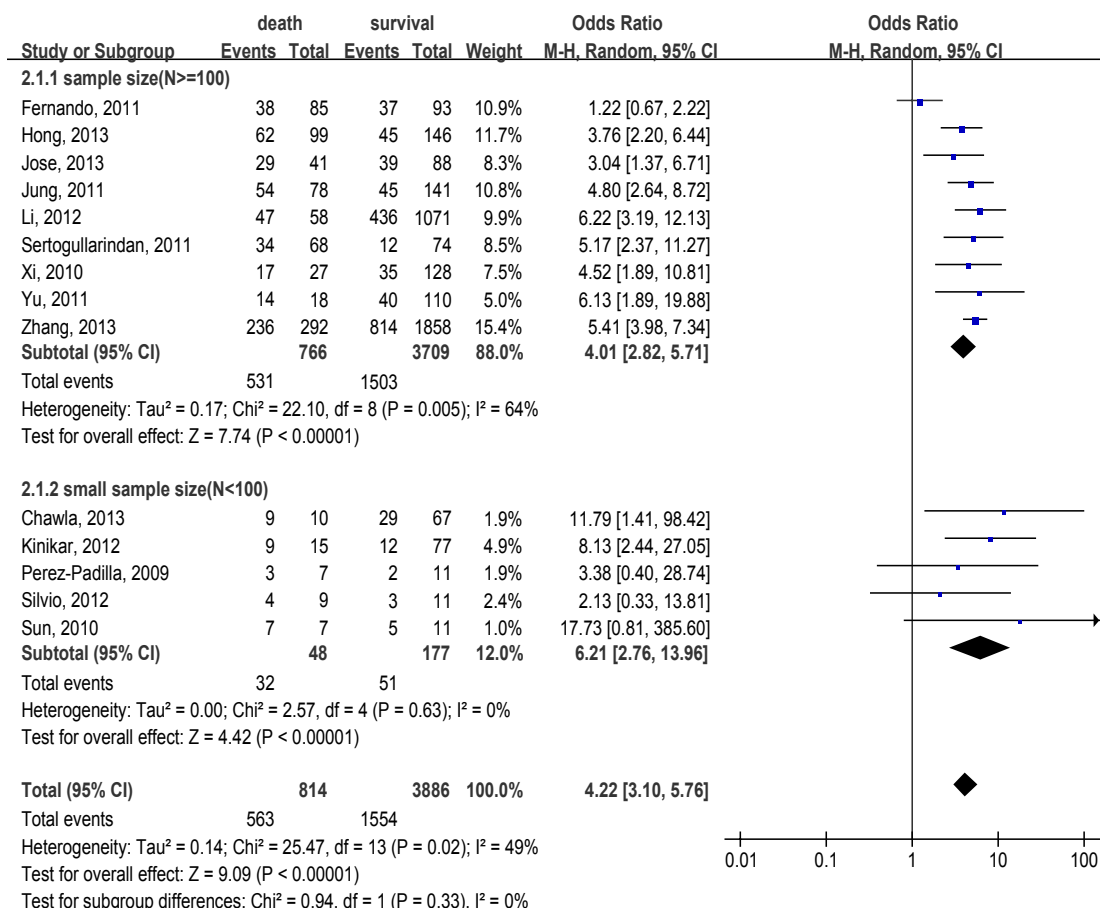

Figure A. Effect of corticosteroid on influenza A (H1N1) cases in different sample size subgroups

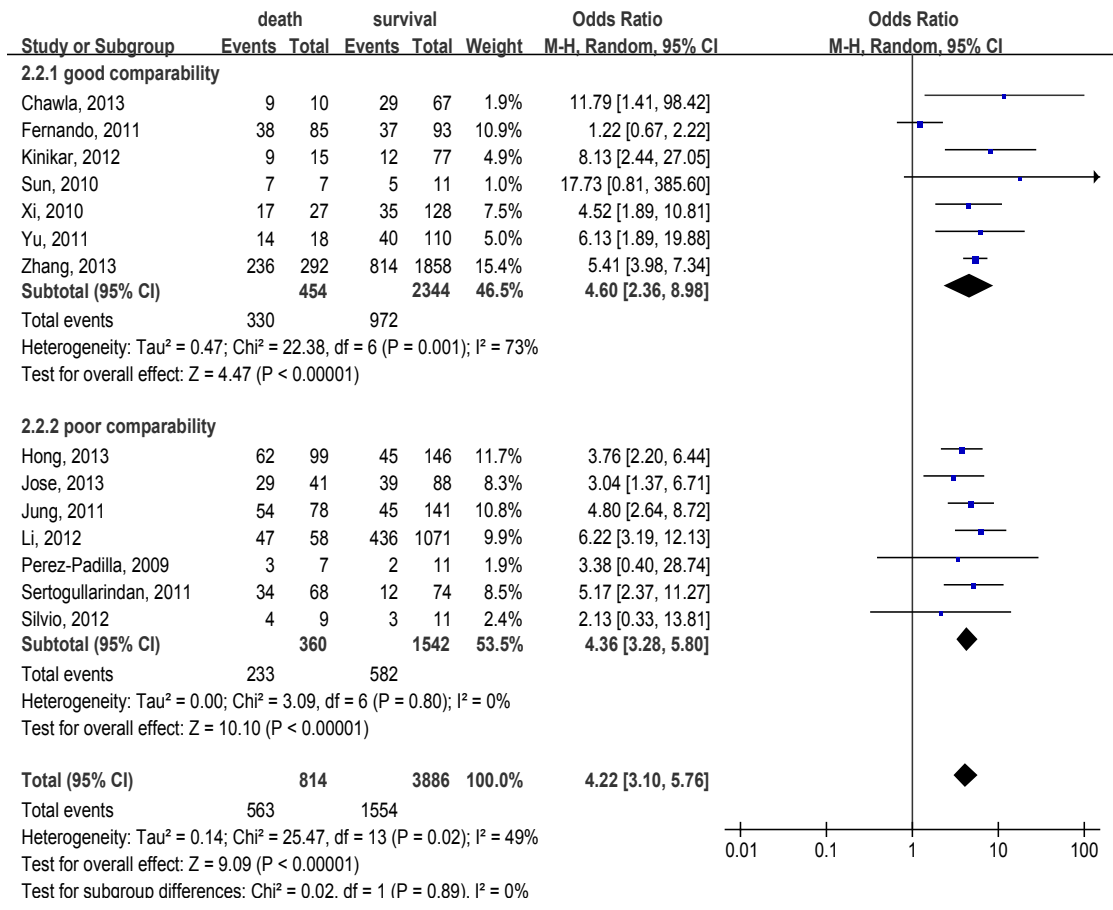

Figure B. Effect of corticosteroid on influenza A (H1N1) cases in subgroups with different comparability between cases and controls

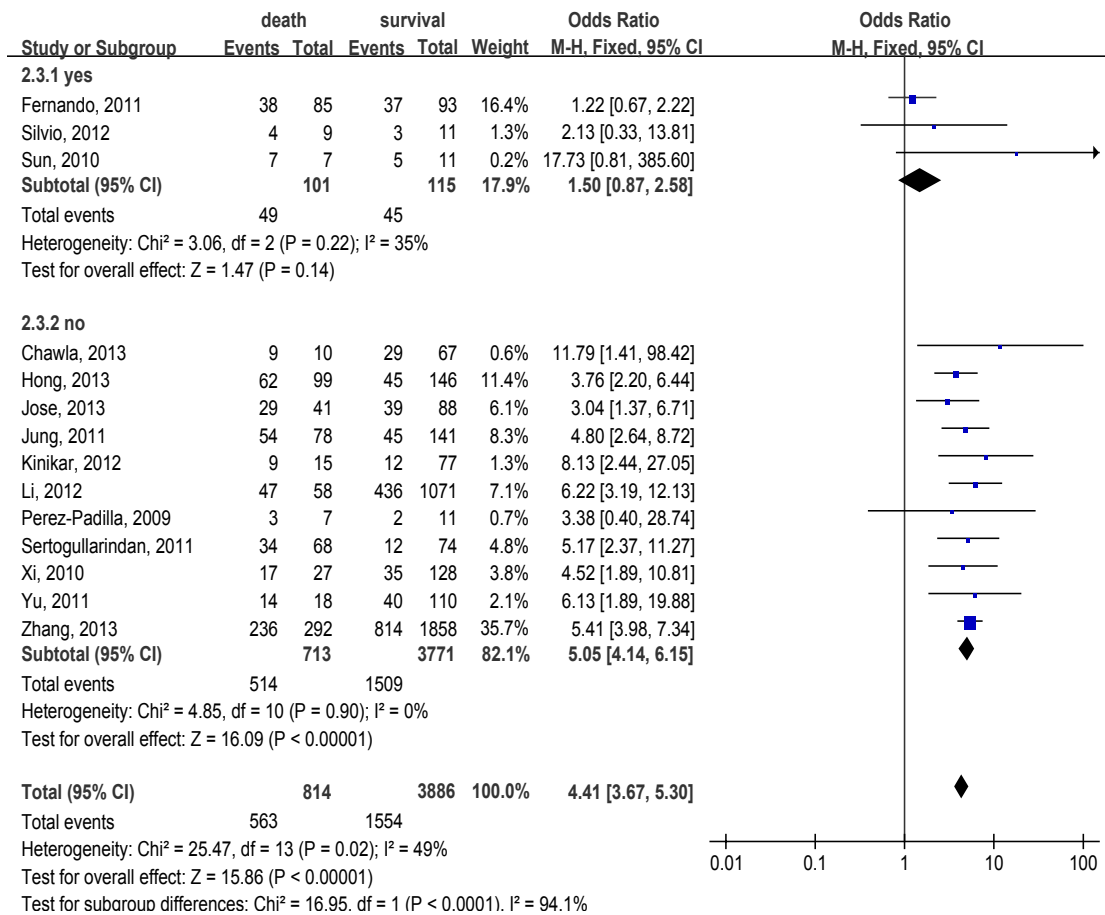

Figure C. Effect of corticosteroid on influenza A (H1N1) cases in subgroups with or without probable and/or suspected Pandemic A(H1N1) cases.
