# Supplementary material for: Do corticosteroids reduce the mortality of influenza A (H1N1) infection? A meta-analysis
Source: Springer Nature journal article supplement (doi:10.1186/s13054-015-0764-5), 2015-02-03
Supplement: MOESM3 [file 9780140]

### Additional file 3: Forest plots of subgroup analyses for cohort studies

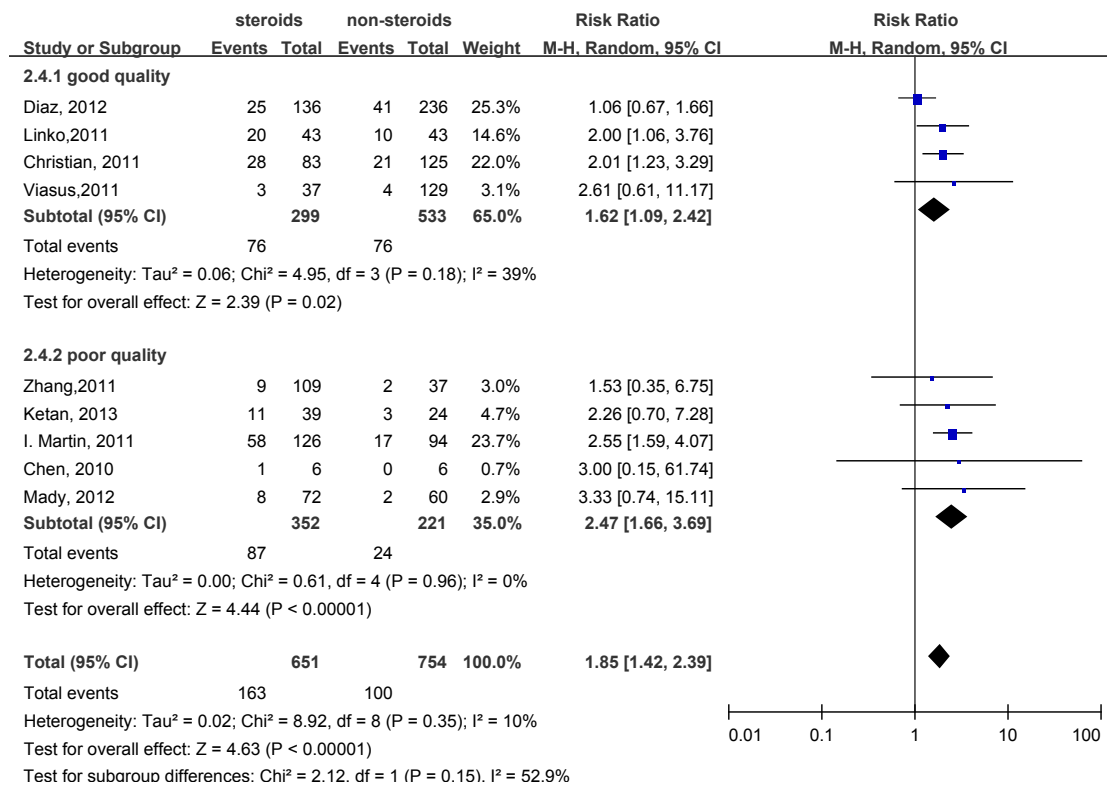

Figure A. Effect of corticosteroid on influenza A (H1N1) cases in subgroups with different study qualities

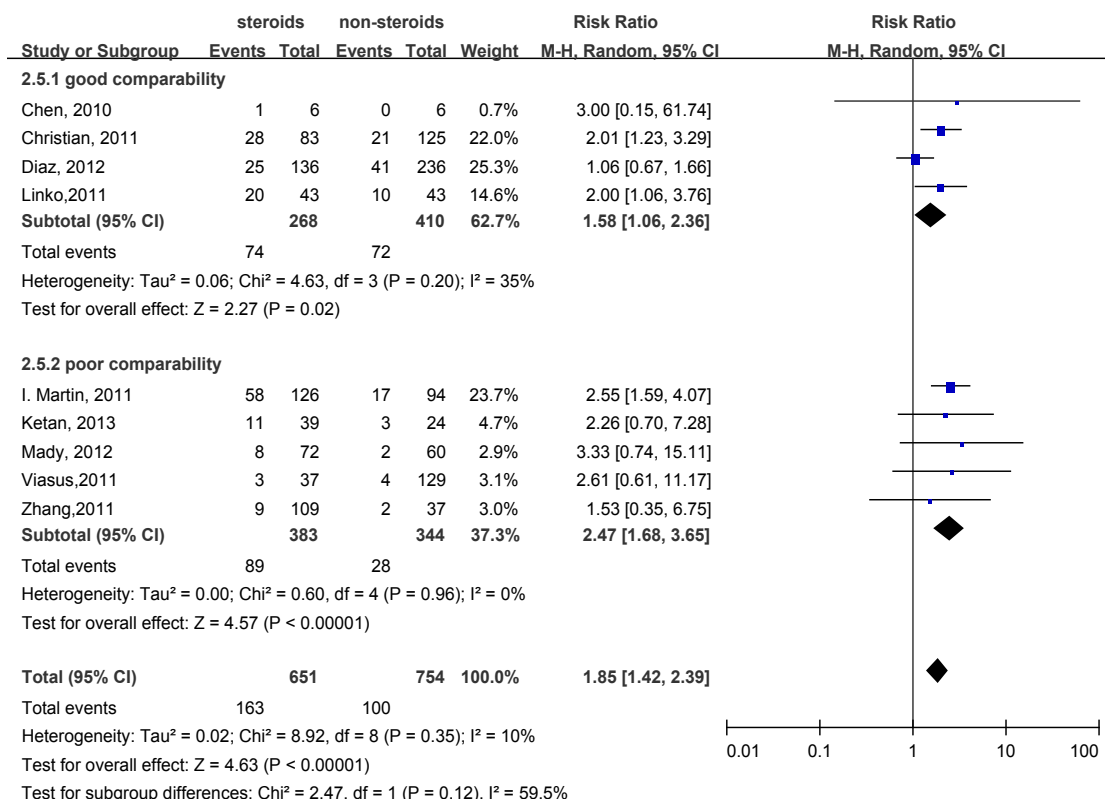

Figure B. Effect of corticosteroid on influenza A (H1N1) cases in subgroup studies with poor and good comparability in terms of age and antiviral treatment

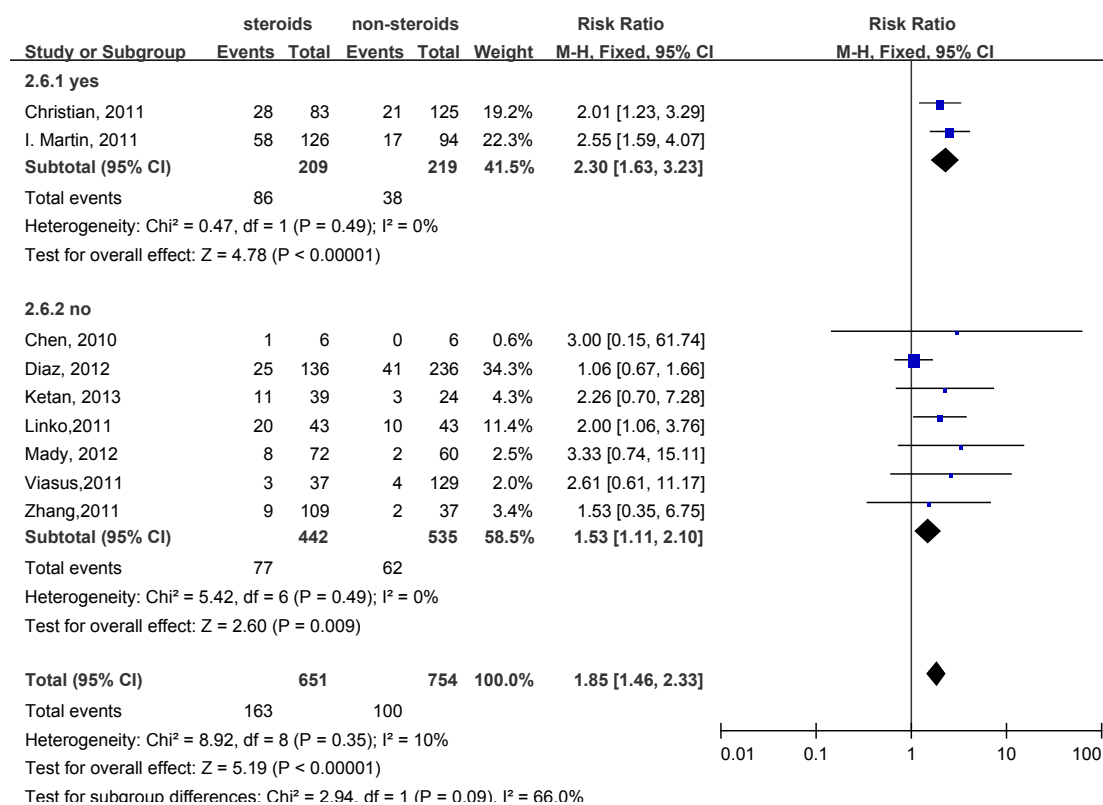

Figure C. Effect of corticosteroid on influenza A (H1N1) cases in subgroups with and without suspected and /or probable cases
