# Supplementary material for: Do corticosteroids reduce the mortality of influenza A (H1N1) infection? A meta-analysis
Source: Springer Nature journal article supplement (doi:10.1186/s13054-015-0764-5), 2015-02-03
Supplement: MOESM4 [file 9780140]

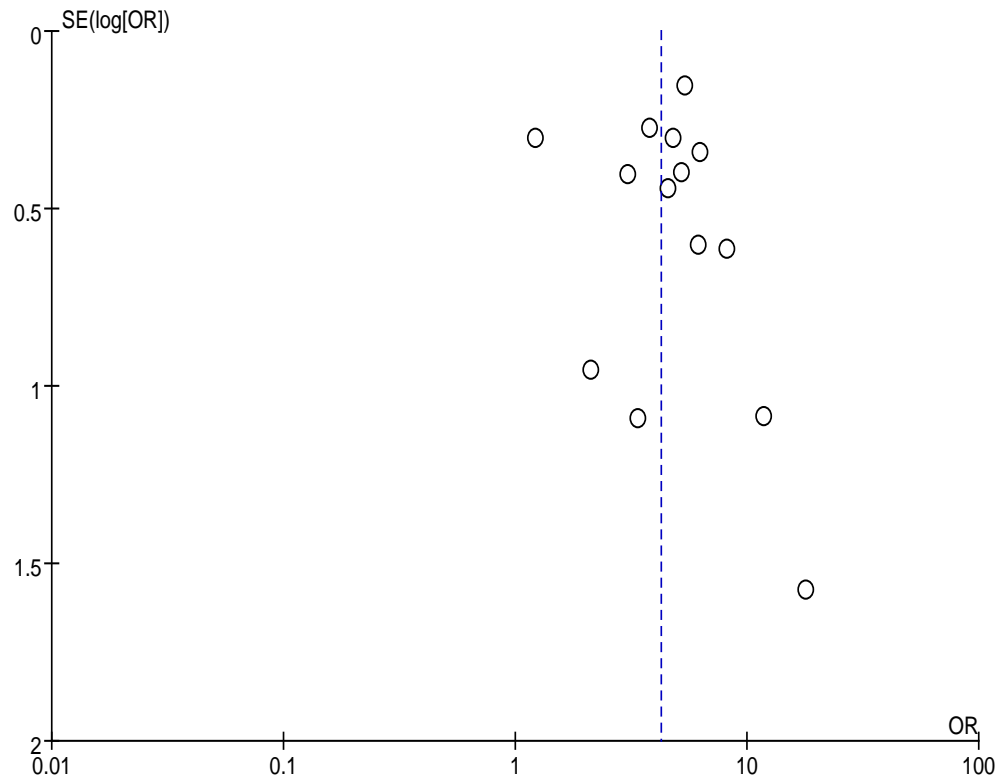

Figure1. Funnel plot for case control studies

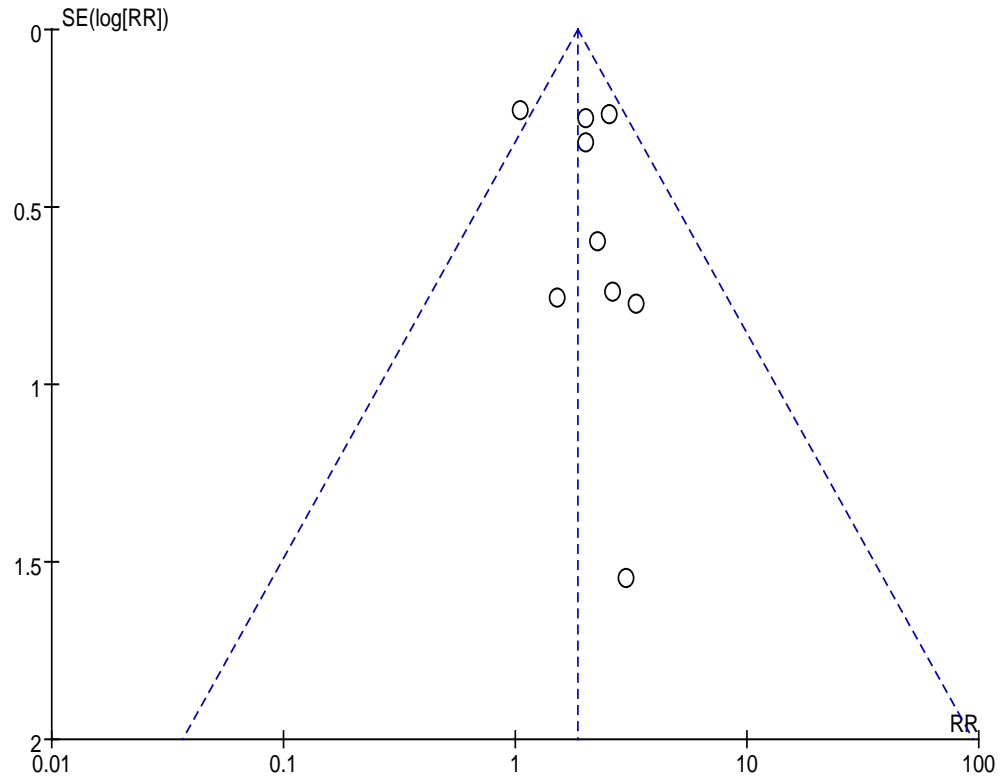

Figure2. Funnel plot for cohort studies
